# Supplementary material for: Deciphering the Molecular Basis for Attenuation of Flavobacterium columnare Strain Fc1723 Used as Modified Live Vaccine against Columnaris Disease
Source: MDPI journal article supplement (doi:10.3390/vaccines9111370), 2021-11-22
Supplement: s1 [file s1]

## Supplementary Table S1.

**Table S1.** Analysis of single nucleotide polymorphisms (SNPs) compared between vaccine strain and parent strain.

| SNP_Pattern | FcB27_Contig     | FcB27_PosInContig | Fc1723_Contig    | Fc1723_PosInContig | RAST Annotation ID   |
|-------------|------------------|-------------------|------------------|--------------------|----------------------|
| TG          | scf7180000000036 | 99642             | scf7180000000021 | 520299             | fig 996.58.peg.158   |
| GA          | scf7180000000036 | 125027            | scf7180000000021 | 545685             | fig 996.58.peg.168   |
| GT          | scf7180000000036 | 125076            | scf7180000000021 | 545734             | fig 996.58.peg.168   |
| CA          | scf7180000000039 | 83013             | scf7180000000021 | 98057              | fig 996.58.peg.405   |
| GA          | scf7180000000039 | 132995            | scf7180000000021 | 148039             | fig 996.58.peg.443   |
| CA          | scf7180000000043 | 500199            | scf7180000000023 | 1492283            | fig 996.58.peg.1308  |
| CT          | scf7180000000043 | 534202            | scf7180000000023 | 1526286            | fig 996.58.peg.1341  |
| GT          | scf7180000000044 | 91216             | scf7180000000018 | 340971             | fig 996.58.peg.1428  |
| TC          | scf7180000000044 | 41423             | scf7180000000018 | 390758             | fig 996.58.peg.1396  |
| CT          | scf7180000000044 | 41416             | scf7180000000018 | 390765             | fig 996.58.peg.1396  |
| GA          | scf7180000000044 | 1363              | scf7180000000018 | 430889             | none CDS or RNA      |
| CT          | scf7180000000044 | 1361              | scf7180000000018 | 430893             | none CDS or RNA      |
| AG          | scf7180000000044 | 1147              | scf7180000000018 | 431113             | none CDS or RNA      |
| GA          | scf7180000000047 | 741630            | scf7180000000023 | 245486             | hypothetical protein |
| GT          | scf7180000000047 | 249370            | scf7180000000023 | 737762             | none CDS or RNA      |
| CA          | scf7180000000044 | 114715            | scf7180000000018 | 317483             | none CDS or RNA      |
